# Supplementary material for: A comparative trend analysis of maternal and child health service utilization before and during Covid-19 at Dire Dawa administration public health facilities, Ethiopia, 2021
Source: Research Square preprint supplement (doi:10.21203/rs.3.rs-1348661/v1), 2022-02-15
Supplement: Supplementary file 1 [file c74b24f6d7bc694f31d73c4c.docx]

Table 4: Traditional expert modeler forecast for MCH service utilization before and during covid-19 at selected health facilities of Dire Dawa Administration, Ethiopia, 2020.
